# Supplementary material for: One Pot Synthesis of Large Gold Nanoparticles with Triple Functional Ferrocene Ligands
Source: MDPI journal article supplement (doi:10.3390/ijms22052328), 2021-02-26
Supplement: s1 [file s1]

## Supporting Information

### One Pot Synthesis of Large Gold Nanoparticles with Triple Functional Ferrocene Ligands

Shenqing Wang, Fang Liu, Yin Liu, Hongyu Zhou, Bing Yan\*

#### Contents

Figure S1. GNPs dispersed in aqueous solution and have good dispersion and stability.

Figure S2. Dose dependent effect of GNPs induced cytotoxicity.

Table S1. Effect of dispersant in stage one.

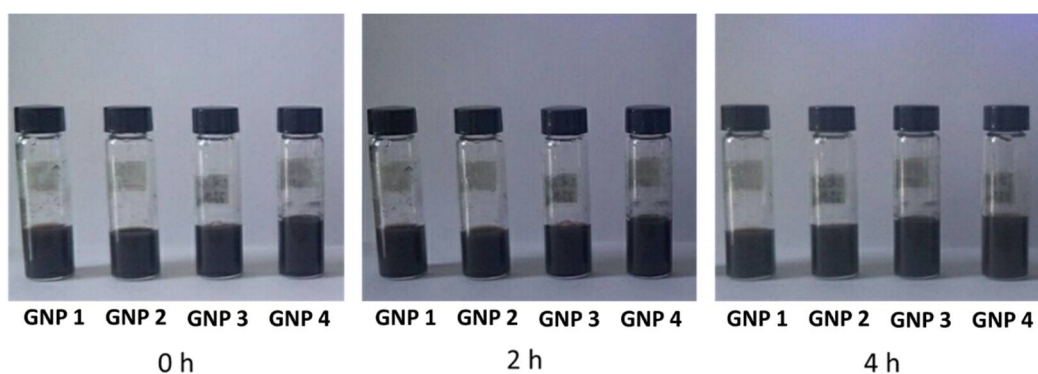

**Figure S1.** GNPs dispersed in aqueous solution and have good dispersion and stability.

The aqueous dispersion of the GNPs was sonicated and dispersed by sonication for 15 minutes. The aqueous dispersion of GNPs is uniform and stable.

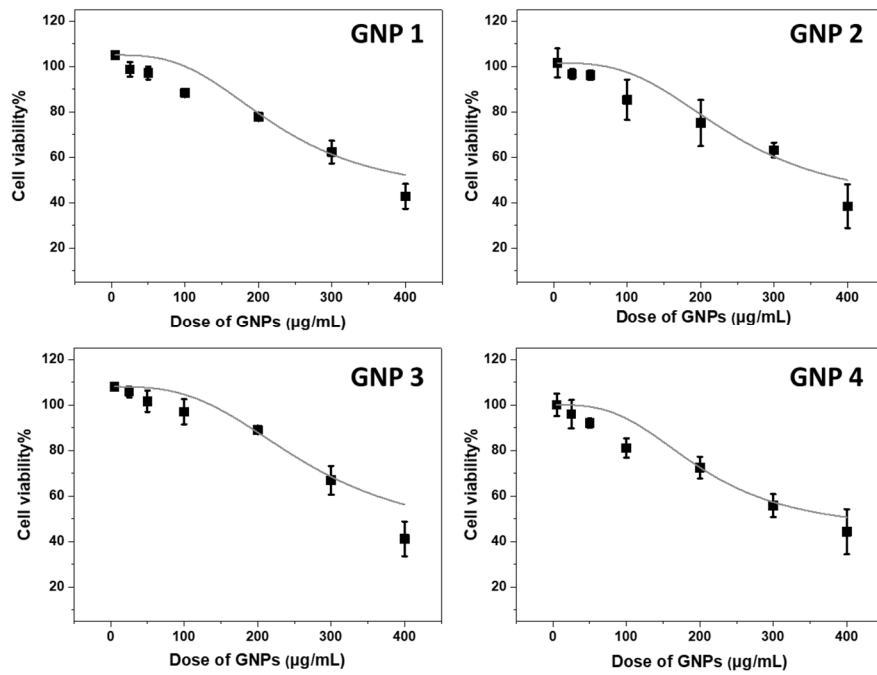

**Figure S2.** Dose dependent effect of GNPs induced cytotoxicity. Dosing concentrations were 12.5, 25, 50, 100, 200 and 400 µg/mL, respectively. After treatment with GNPs 48 h, cells were analyzed by CellTiter-Glo® assay through luminescence. Error bars indicate mean±standard deviation (n=3).

**Table S1.** Effect of dispersant in stage one.

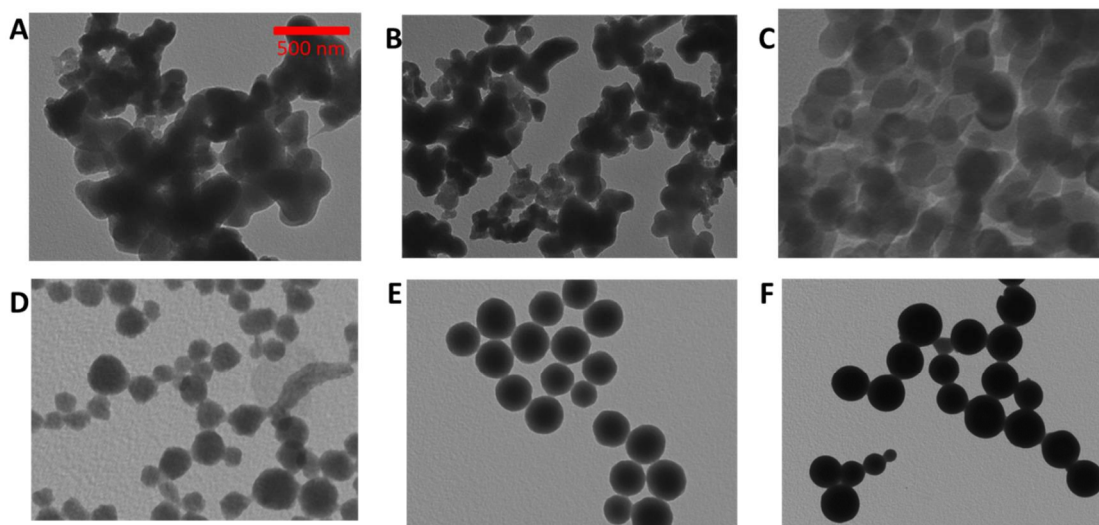

|   | Dispersant                      | Dose                        | Reaction time                     | Shape           | Approximate size of particles |
|---|---------------------------------|-----------------------------|-----------------------------------|-----------------|-------------------------------|
| A | Null                            | 0                           | Step 1: 60 min<br>Step 2: 240 min | Polygon         | ~ 100 nm                      |
| B | Citric acid                     | 0.0064 mmol                 | Step 1: 60 min<br>Step 2: 240 min | Irregular shape | ~ 200 nm                      |
| C | Sodium citrate<br>+ Citric acid | 0.0032 mmol<br>+0.0032 mmol | Step 1: 60 min<br>Step 2: 240 min | Polygon         | ~ 200 nm                      |
| D | Sodium citrate                  | 0.0032 mmol                 | Step 1: 60 min<br>Step 2: 240 min | Ellipsoid       | ~ 150 nm                      |
| E | Sodium citrate                  | 0.0064 mmol                 | Step 1: 60 min<br>Step 2: 240 min | Spherical       | ~ 200 nm                      |
| F | Sodium citrate                  | 0.0096 mmol                 | Step 1: 60 min<br>Step 2: 240 min | Spherical       | ~ 200 nm                      |
